---

# Decoupling of timescales reveals sparse convergent CPG network in the adult spinal cord

**Marija Radosevic<sup>1</sup>, Alex Willumsen<sup>1</sup>, Peter C. Petersen<sup>1</sup>, Henrik Linden<sup>1</sup>, Mikkel Vestergaard<sup>1</sup> and Rune W. Berg<sup>1\*</sup>**

<sup>1</sup> Faculty of Health and Medical Sciences, Department of Neuroscience, University of Copenhagen, Blegdamsvej 3, DK-2200 Copenhagen N, Denmark

\*Correspondence: [runeb@sund.ku.dk](mailto:runeb@sund.ku.dk)

---

During generation of rhythmic movements, most spinal neurons receive oscillatory synaptic drive. The neuronal architecture underlying this drive is unknown, and the corresponding network size and sparseness have not yet been addressed. If the input originates from a small central pattern generator (CPG) with dense divergent connectivity, it will induce correlated input to all receiving neurons, while sparse convergent wiring will induce a weak correlation, if any. Here, we use pairwise recordings of spinal neurons to measure synaptic correlations and thus infer the wiring architecture qualitatively. A strong correlation on a slow timescale implies functional relatedness and a common source, which will also cause correlation on fast timescale due shared synaptic connections. However, we consistently found marginal coupling between slow and fast correlations regardless of neuronal identity. The inhibitory connectivity was < 1%, and the excitatory conductivity was even lower. This suggests either a sparse convergent connectivity, or a CPG network with pervasive recurrent inhibition that actively decorrelates common input.

Movement is an essential part of our daily lives, and disorders of the motor system, such as spasticity, amyotrophic lateral sclerosis, and spinal cord injury are particularly debilitating for individuals. Simple rhythmic movements, such as walking and breathing, have constituted models for fundamental aspects of the motor system. In spite of extensive investigations,<sup>1,2,3,4,5,6</sup> the network connectivity underlying the activity remain unknown. A circuit component, known as a central pattern generator (CPG), is believed to transmit command signals to motoneurons and local premotor interneurons.<sup>7,8,9,10</sup> Although the size of such a network is known to be responsible for the respiratory drive center, i.e., the preBötzing complex,<sup>1,11</sup> general features of CPG wiring for locomotion and other movements are not well understood. A feedforward organization is often proposed between groups of neurons or ‘modules’, which exhibit alternating rhythmic bursting<sup>12</sup> (**Fig. 1a**). Common drive modules are thought to be small, e.g., the preBötzing complex has only 600 neurons,<sup>1</sup> which provides rhythmic drive for the rest of the network. The projection is also believed to diverge onto a much larger population of receiving neurons.<sup>13,14,15</sup> Thus, the receiving neurons would share the same connections via a dense divergent connectivity (**Fig. 1b**). Since the transmission is communicated by action potentials, which are precise in time, a dense connectivity will manifest as a strong temporal correlation between synaptic potentials in the receiving neurons, and this correlation can be verified experimentally through pairwise recordings. If the drive network is not a small but rather a large population, however, the receiver neurons are likely to collect sparse convergent input without correlation (**Fig. 1c**). Hence, the assessment of correlation via pairwise sampling from local neurons will provide important information about the fundamental structure of the premotor network.<sup>16,17,18</sup>

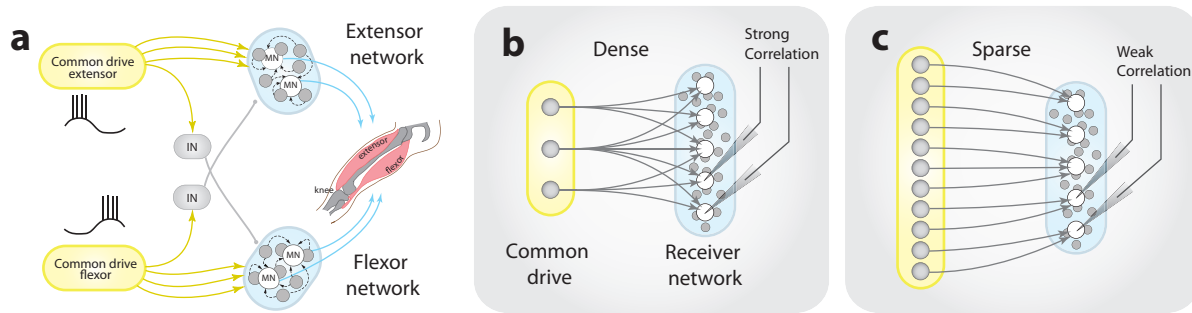

**Figure 1: Scenarios of feedforward connectivity of motor networks and the expected pairwise correlation.** (a) Traditional half-center model with feedforward connections from a common drive network (yellow shaded area) to flexor- and extensor-related neurons in the spinal cord including reciprocal inhibition (IN). The common-drive network of unknown size and architecture projects to functionally related local neurons in the lumbar spinal cord (blue shaded region). (b) A densely connected input from the common-drive network consisting of few neurons with many connections per neuron (high out-degree) results in strongly correlated input across the receiver neurons (blue). (c) A sparsely connected and large common-drive network with small out-degree results in weak correlation across the receiver neurons. The number of connections coming in to the receiver network (the *in-degree* distribution) is the same as in (b).

Here, we use hindlimb scratching of adult turtles as a model for stereotypical rhythmic movement, and investigate the pairwise correlation between motoneurons, as well as interneurons, in a spinal cord network. The turtle preparation offers the unique advantage of being resistant to anoxia, which permits retaining functionally-intact motor activity induced purely by natural somatic stimuli. Further, the mechanical stability of this preparation allows remarkable access to synaptic input across pairs of neurons via dual intracellular recording,<sup>19,20</sup> which has previously been unattainable in the lumbar enlargement. First, we utilize dual intracellular recordings to assess the strength of synaptic correlations, in particular for pairs belonging to the same module. Next, we use multi-electrode arrays to measure population activity to determine the pairwise spike-spike correlation as an alternative indicator for shared synaptic input. In both approaches, we found a consistent decoupling between the slow rate modulation and the fast synaptic activity, even for pairs belonging to the same module. This indicates that the similarity in slow rhythmic activity across spinal neurons is not due to input from the same source. We propose two explanations for this paradoxical observation. First, according to a minimalist feedforward model, the common drive network must be large with sparse convergent connections. Alternatively, the network does not have a pure feedforward architecture, but includes recurrent connectivity<sup>21,22</sup> and consequently *active decorrelation*. Active decorrelation is a mechanism observed, e.g., in the neocortex, by which correlated input due to shared connectivity is partially cancelled by inhibition.<sup>23,24,25,26</sup> The latter interpretation, if true, implies a role of inhibition of spinal motor circuitry, which is fundamentally different from the previously assumed.

## RESULTS

We recorded from pairs of spinal neurons ( $n=66$  pairs) either motor neurons (MNs) or interneurons (INs) located in the lumbar region of adult turtles (segments D9/D10). Multielectrode arrays were also inserted into the same region of the spinal cord (up to 256 channels, in  $n=$  six animals) in order to investigate the correlated activity of a subset of the neuronal population. A computational model was implemented to assist in predicting the strength of correlated input for different degrees of sparseness within the common source network.

### Pairwise correlation to infer sparseness and size: predictions

The correlation of synaptic input across a pool of receiving neurons depends on how many shared connections they obtain from a source network. To quantify this, we employed a minimalist model, which consists of a source network of variable size that projects to a receiver network, which represents the local spinal INs and MNs (Fig. 1). A given number of arriving synaptic connections to a group of neurons can either be provided by small population neurons with many axon collaterals (Fig. 1b), i.e., a dense/divergent connectivity, or a large population with few axon collaterals, i.e., a sparse/convergent connectivity (Fig. 1c). Thus, synaptic

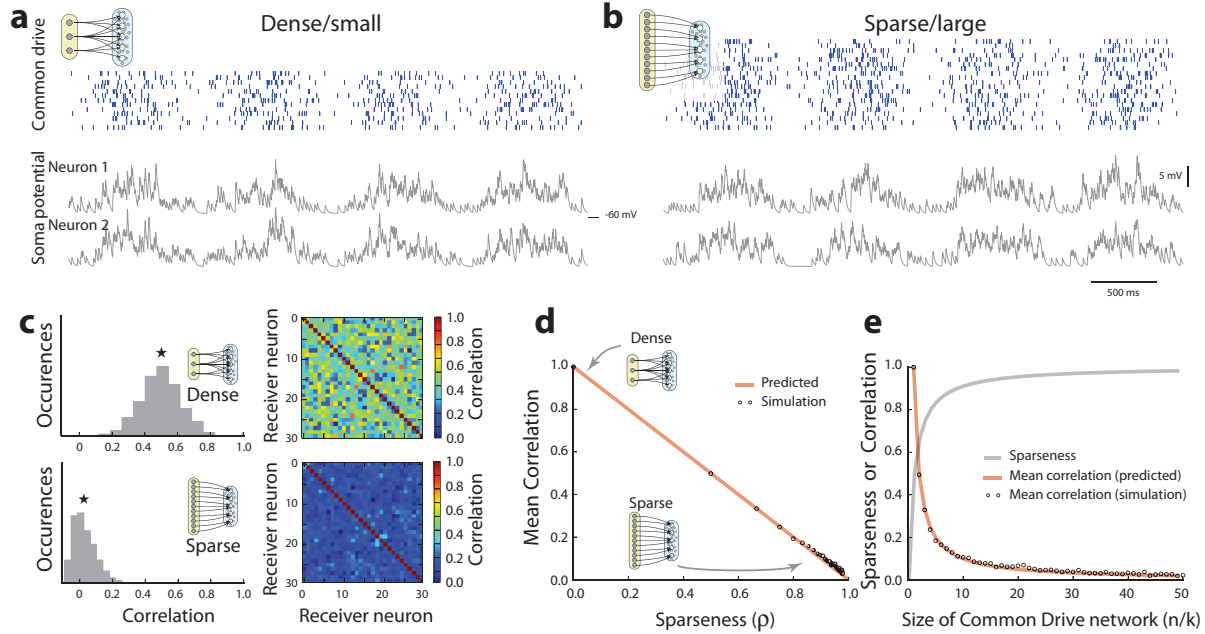

**Figure 2: Synaptic correlation depends on network size and architecture.** (a) Oscillatory spiking activity in a small common drive model network (raster) projecting via divergent connections results in a rhythmic  $V_m$  of target neurons with substantial correlation on both fast and slow timescales. Sample traces shown (gray),  $R = 0.5$  on fast timescale. (b) Sparse convergent connectivity from a larger premotor network gives weak correlation ( $R = 0.02$ , fast). (c) Distribution of fast correlation for receiving pairs with dense/small (top) versus sparse/large connectivity (bottom) for the conditions in a ( $n = 20$  cells) and b ( $n = 500$ ). Correlation matrix for the receiving population shown in colors to the right. (d) Mean fast correlation ( $\star$  in c) is inversely linked to sparseness. (e) Sparseness (gray) increases and fast correlation (orange) decreases with network size. The *in-degree* is kept constant ( $k = 10$ ).

correlation in the receiver network can provide important insight about the connectivity, i.e., whether it is dense or sparse. In graph theory, density is often defined as the number of connections ( $k$ ) divided by the total possible number of connections<sup>27,28</sup> ( $n$ ), i.e.  $k/n$  (see online methods). We define sparseness ( $\rho$ ) as the inverse of density, i.e.  $\rho = 1 - k/n$ . Since the correlation of input across two receiving neurons does not depend on how many other neurons receive the same input, the size of the receiver network is irrelevant and therefore kept constant. Consequently, there will be a large overlap in input, and thus high correlation when the source network is small (dense connectivity). This is opposed to when the network is large with convergent connections, in which the correlation is expected to be negligible.

Testing this prediction in our model, we found that a dense input from a small group of common drive neurons ( $\rho = 0.5$ ) with rhythmic yet independently Poisson spiking (Fig. 2a) caused a high correlation in membrane potential of pairs of neurons. In the contrary situation, a large and sparsely connected common drive network ( $\rho = 0.98$ ) evoked membrane potential fluctuations across pairs of receiving neurons, which had little resemblance other than the slow rhythm (Fig. 2b). The distribution of synaptic correlation between pairs was relatively high for the dense/divergent network (top, Fig. 2c) while the sparse/convergent network had a nearzero value (bottom). Both distributions exhibited a large variance around the mean ( $\star$ ). Such large variance around a small mean for the sparse architecture is qualitatively similar to what has been observed in balanced neocortical networks.<sup>23,24,29</sup> Variability can also be seen in the correlation matrix (right). Changing the architecture in our model from dense to sparse, we observed a direct inverse relation between sparseness and the correlation of synaptic input in the receiving cells (Fig. 2d). Further, the mean correlation coefficient was dependent on the size of the source network. The correlation showed a graceful decay with network size as  $1/n$  (Fig. 2e). The network sparseness, on the other hand, climbed towards 1 as the size of the network increased (gray line). In conclusion, the correlation between input to a pair of randomly selected receiving neurons is an indicator of both network sparseness and the relative size of the common source network. Specifically, the weaker the shared input is, the more large and sparse is the source network.

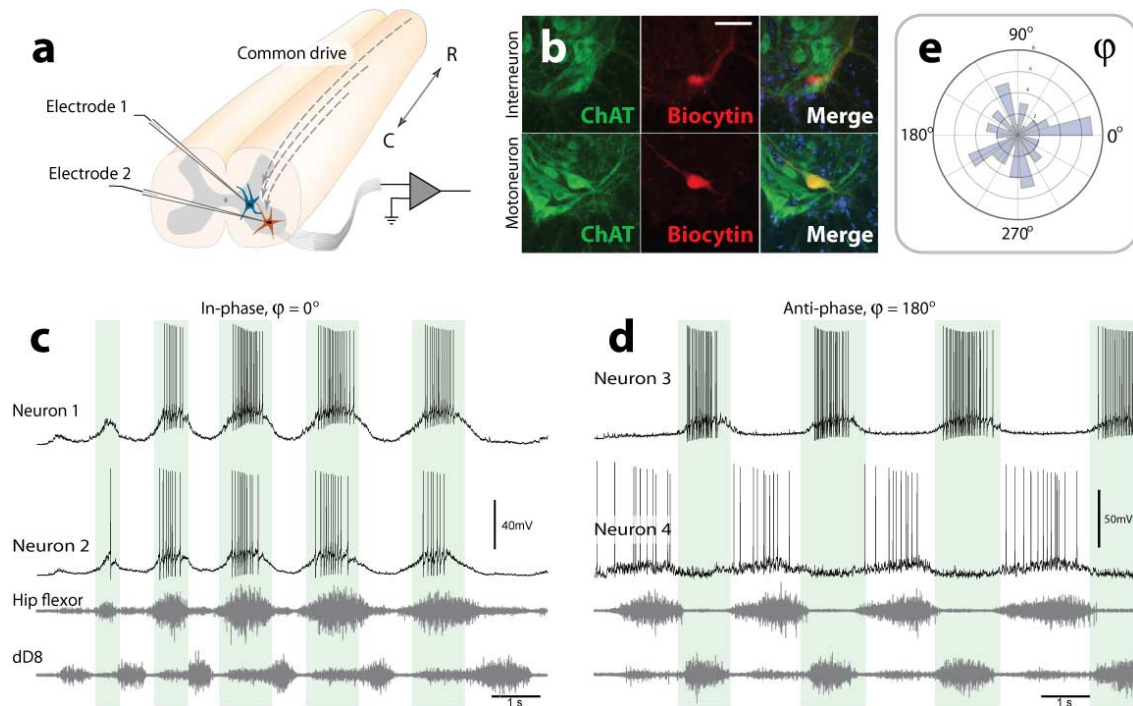

**Figure 3: Diverse phase relations during spinal motor patterns.** (a) Experimental setup: Pairwise intracellular recording from the lumbar spinal cord of turtles (medial–ventral horn) during touch–induced scratching. (b) Histology of a recorded pair of neurons filled with biocytin (red) reveals an IN (ChAT–negative, top row) or a MN (ChAT–positive neuron, green, bottom row). Scale bar  $50\mu\text{m}$ . (c) Two in–phase neurons during motor activity concurrent with hip–flexor and a knee–extensor synergist (dD8) nerve activity. (d) Anti–phase MN–IN neuron pair (histology shown in from (b)). Shaded regions indicate on–phase of the top panel neuron. (e) Phase between pairs indicate wide representation from  $0$  to  $360^\circ$  ( $n = 66$  pairs).

### Functional modules grouped by phase

The premise of the above analysis is that a given pair of receiving neurons belongs to the same functional module. However, a local spinal population consists of neurons involved in various activities from flexion to extension, as well as other synergist contractions with various phase lags.<sup>30</sup> These distinct groups of neurons are naturally expected to receive uncorrelated input due to differences in origin. To determine the sources, we distinguish between pairs of neurons according to their phase. Specifically, those with zero phase lag belong to the same functional module,<sup>3,31</sup> while those with large phase lags are incompatible. Hence, we expect to observe an increase in correlation in fast synaptic input as the correlation in slow rate modulation increases, i.e., a ‘coupling’ between timescales.

To verify a coupling between slow and fast correlations, we first conducted dual intracellular recordings from both MNs and INs in the lumbar spinal cord of turtles performing touch–induced scratching (**Fig. 3a**). To avoid the confounding factor of supraspinal input, turtles were spinalized and the muscles were removed to limit proprioceptive feedback and increase mechanical stability, while leaving the cutaneous sensation intact. Post–hoc immunohistology and filling with an intracellular marker (biocytin, red) was performed to assist in the cell–type identification (**Fig. 3b**). Pairwise recordings showed neurons that had a slow rhythmic activity concurrent with a particular nerve, i.e., in–phase activity (**Fig. 3c**). Here, neuron 1 and 2 were in–phase with each other ( $\varphi = 0$ ), as well as the hip–flexor nerve activity. Another sampled pair exhibited anti–phase activity ( $\varphi = 180^\circ$ ) in spite of their close proximity (**Fig. 3d**). In fact, all of the neuronal pairs had many different phase lags (**Fig. 3e**) regardless of their close physical location ( $< 300\mu\text{m}$ ). A similar poor relationship between physical location and phase delay has been previously observed in turtles,<sup>32</sup> as well as other animals, e.g., neonatal mice.<sup>4,33,34</sup> Consequently, spinal neurons receive various common drives, and it is not possible to rely on their somata location for classification of functional relatedness.



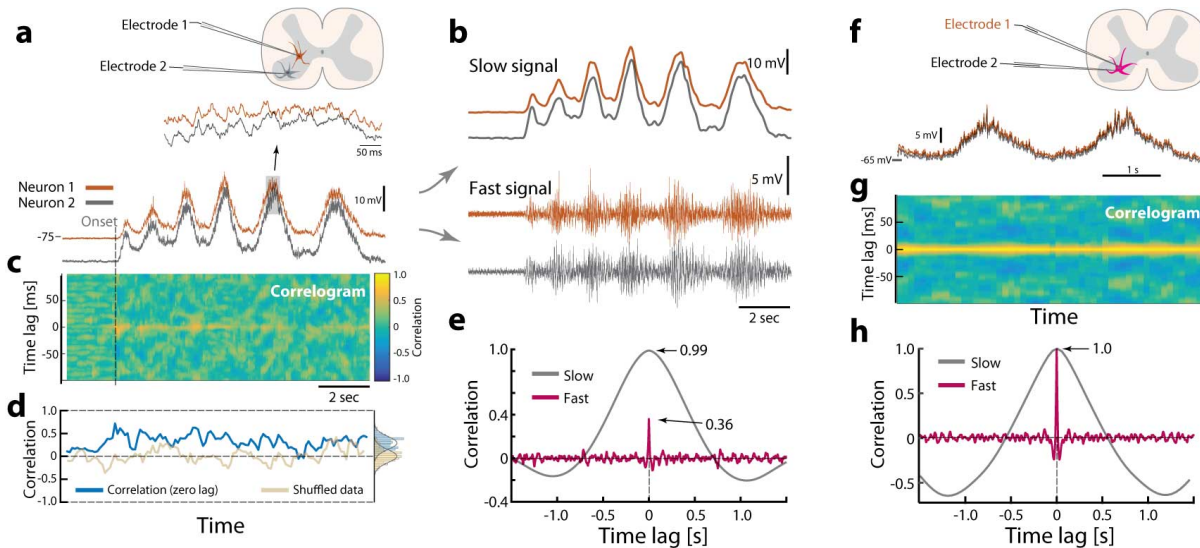

**Figure 4: Two timescales of synaptic input.** (a) Sample data of recordings of two spinal neurons kept hyperpolarized to prevent spiking during network activity (onset indicated, pair from Fig. 3c). Highlighted region indicates concurrent membrane potentials. (b) Separating traces into slow (top) and fast signals (bottom) by digital filtering. (c) Common synaptic input is quantified by the correlation of the fast signal in a temporal window (400 ms) moving in time, i.e. correlogram with time on x-axis, time-lag on y-axis. A small albeit significant correlation is seen as a yellow horizontal shadow. (d) The zero-lag correlation (blue) indicates no clear temporal relation to the rhythm. Distribution shown vertically (right,  $\mu=0.29$ ). Shuffled data (beige). (e) Strong slow correlation (0.99), whereas the fast is weak (0.36, excluding quiescence), indicating a decoupling between slow rate modulation and fast synaptic input. (f) Paired recording from same cell as control. (g) Correlogram for same-cell dual recordings similar to panel c. (h) Same-cell recording show coupling between slow and fast correlation (both peak at 1).

### Slow and fast synaptic activities are decoupled

Instead of using somata location to classify functional relatedness between neuronal pairs, we utilize the cross-correlation of their rhythmic activity. If a pair is in-phase, both neurons will presumably belong to the same flexor/extensor module.<sup>31,30</sup> If they belong to the same module, they should receive a large proportion of synaptic input from the same source, and this will manifest as a strong correlation on a fast synaptic timescale. To quantify this, we divided the membrane potential (Fig. 4a) into slow and fast signals (Fig. 4b). Correlation in the slow signal represents functional relatedness; whereas, correlation in the fast signal represents directly shared synaptic input. The fast signals were correlated in a sliding 400 ms-window in order to probe temporal aspects of the correlation (Fig. 4c). Even though the correlation on a fast timescale exhibited some variability, it did not possess a clear relationship with motor rhythm (blue line). The variability can be associated with uncertainty in estimation since the shuffled data contained similar dynamics (blue and beige lines Fig. 4d). Although this sample pair had the highest correlation on a fast timescale among all pairs, the correlation was rather weak when comparing the distribution of correlations over time with the shuffled data (vertical histograms Fig. 4d). For the fast correlation averaged over the whole trace (red, Fig. 4e), this sample pair exhibited an almost perfect correlation on a slow timescale (gray, Fig. 4e) yet a relatively weak synaptic correlation (compare 0.36 with 0.99). Thus, we conclude that the strong correlation on a slow timescale was not caused by shared synaptic input.

This absence of fast correlation could be due to electrotonic filtering within the cell if the synaptic contacts of the correlated source were located far apart on the cell. To test this, we performed dual recordings ( $n = 5$ ) of the same neuron (not the one in a-d). We recorded the membrane potential of the same neuron at two locations of the cell (Fig. 4f). Here, an electrotonic separation of the potentials should manifest as a lack of pairwise correlation. Nevertheless, the correlation in synaptic potentials of the two electrodes were close to 1 throughout the activity (Fig. 4g) and much higher than for the correlation between the two different neurons (Fig. 4e). A corresponding high correlation was also found in the slow signal (Fig. 4h). Similar results were found in the other pairwise recordings ( $n = 5$ ). Thus, we conclude that the lack of correlation on a fast timescale between two neurons is not due to electrotonic filtering. These data also ensure that the recorded fluctuations, which may appear to be noise, are correlated in both electrodes, and it is therefore not

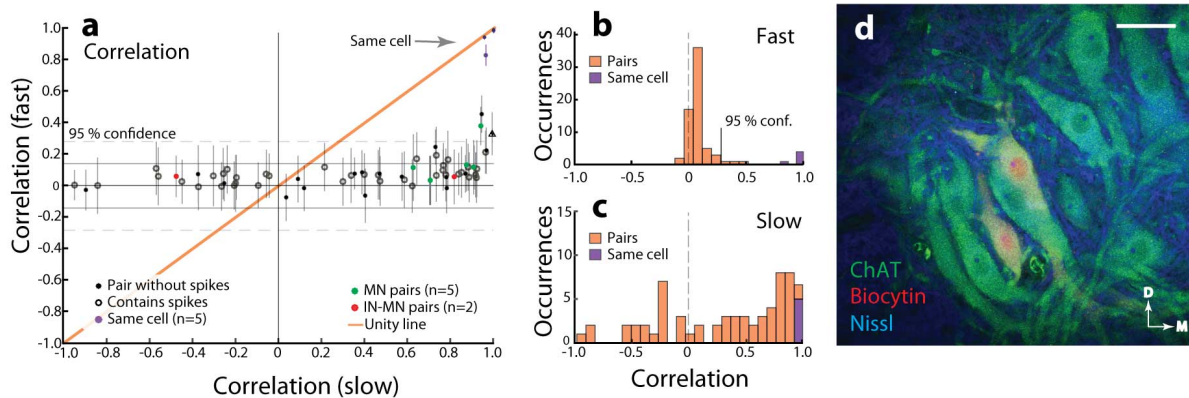

**Figure 5: Decoupling of slow and fast timescales of synaptic input.** (a) Correlation in synaptic input to pairs of neurons ( $n = 66$ ) on slow timescale (i.e. input rate modulation, abscissa) vs. fast correlation (synaptic potentials, ordinate). A departure from the unity line (orange) indicates that correlated rate modulation is not caused by the same synaptic drive. As a control, paired recordings from same cells ( $n = 5$ ) does not exhibit such a departure (purple points indicated). Confidence limits assessed as  $2\sigma$  from the mean of shuffled data. Pair from **Fig. 4a–e** indicated ( $\Delta$ ). (b) Synaptic correlation (fast) is scattered close to zero (with a slight positive bias) and has only only 4.5% ( $n = 3/66$ ) above the 95% confidence limit. (c) Slow correlation has a weak mode close to 1. (d) Close proximity of MNs (biocytin (red) and ChAT (green)) does not grant high correlation in synaptic input ( $R = 0.36$ , right green point in a). Nissl stain in blue. Location in left ventral horn. Scale bar  $50\mu\text{m}$ .

electronic noise, but rather fluctuations in synaptic input.

Separation of fast and slow synaptic timescales was performed for all pairs, both IN-MN and MN-MN pairs ( $n = 66$  in total), and plotted against each other (**Fig 5a**). Pairs that belong to the same functional module, i.e., have a strong slow correlation, did not exhibit a parallel correlation in the fast activity. This was shown as a departure from the unity line, i.e., a ‘decoupling’ of timescales (**Fig. 5a**). A majority of the pairs had a near zero correlation on a fast timescale (**Fig. 5b**). Only three out of 66 pairs (4.5%) had a correlation higher than  $2\sigma$  from the mean of the distribution for shuffled pairs, which is within what is expected by chance for the 95% confidence limit (solid vertical line). For comparison, no decoupling was observed for dual recordings from the same cell ( $n = 5$ , purple **Fig. 5a–c**). The correlation on a slow timescale had a scattered distribution from negative to positive values (**Fig. 5c**) as expected, considering the previously observed phase distribution (**Fig. 3e**). Even pairs within close proximity (**Fig. 5d**) exhibited remarkable decoupling (0.99 vs. 0.36, green point **Fig. 5a**). This indicates a pervasive decorrelation of synaptic input among pairs of neurons of the same functional module. Based on our previous analysis (**Fig. 2d**) and since the fast correlation is below the significance level (0.0–0.2) the network sparseness is probably about 90% ( $\rho \sim 0.90$ ). Although we neither know the size of common drive network ( $n$ ), nor the in-degree ( $k$ ), the network must be convergent and large, i.e. large  $n/k$ , in order to achieve such high sparseness and low correlation (**Fig. 2e**).

### Spike–spike correlations are decoupled from rate modulation

Until now, our analysis has focused on common source input to pairs of neurons in the lumbar cord, which demonstrated a decoupling between synchrony in slow and fast synaptic activity. Since the correlated synaptic input often causes synchronized discharge<sup>35</sup> we can further substantiate the decoupling by investigating the concurrent spiking of the IN and MN population. To achieve this, we inserted multi-electrode arrays (128–256 channels) into the same part of the lumbar region to greatly increase the number of neuronal pairs in our analysis (**Fig. 6a**). Single units were sorted using polytrode spike sorting as previously described<sup>19</sup> (**Fig. 6b**). This gave the concurrent spike activity of typically  $\sim 300$  neurons in addition to multiple nerve recordings (**Fig. 6c**). Similar to the intracellular data, different units had different phase–preference in rate modulation. The phase of the hip flexor activity (from Hilbert–transformation, third panel) was used to characterize the diversity of the population. The spike–triggered phase distribution was calculated for each unit and plotted in polar histograms, which illustrates the high degree of complexity in the population activity (**Fig. 6d**).

To perform a similar analysis to the pairwise intracellular data (**Fig. 4–5**), the spike activity of individual neurons was divided into a fast and a slow component by convolving the spike times with a thin and a broad Gaussian kernel,  $\sigma = 5$  and 150 ms, respectively (**Fig. 7a**). These traces were then correlated for all neuronal

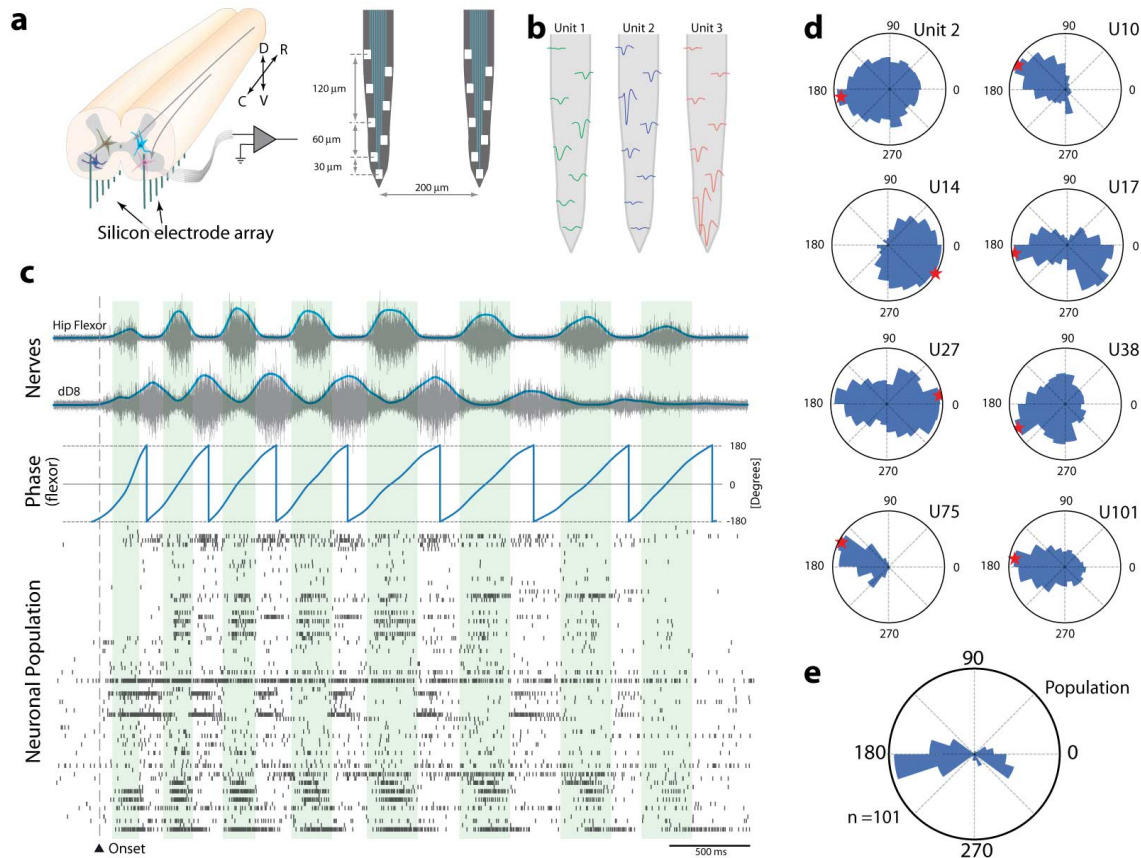

**Figure 6: Population spiking of lumbar neurons.** (a) Silicon multi-electrode arrays (right) were inserted ventrally into the medial-ventral horn in the lumbar spinal cord (left) of semi-intact preparation. (b) Three sample units and their waveforms recorded on the different shank electrode. (c) Touch-induced scratching (onset) has alternating hip flexor (blue top) and knee extensor (blue bottom, dD8). Filtered and Hilbert-transformed motor nerve as phase reference of the rhythm (blue). Raster plot: The spiking activity of lumbar neurons ( $n = 72$ ) has scattered rhythmic activity. (d) Spike-triggered phase histogram in polar plot (blue) for 8 sample neurons, show preferred phase (red star) as well as diversity in spiking. Population shown in bottom histogram.

pairs, and the coefficients were plotted in a composite correlation matrix in colors (**Fig. 7b**). The upper-right half shows the pairwise correlation in slow rate modulation, which contained large negative-to-positive values (blue to red). The lower-left half shows the pairwise correlation on a fast timescale. The white appearance indicates a near-zero value for all pairs. To directly test the coupling between fast and slow correlations, all correlation values were plotted against each other (**Fig. 7c**). A distinct departure from the unity line (orange) was observed, similar to the intracellular data (**Fig. 5a**). The distribution of correlation coefficient on a fast timescale was thinly scattered around zero (bottom, **Fig. 7d**) indicating an absence of correlated spiking, even though many pairs had a strong slow correlation (top) and were therefore functionally related. This decoupling between timescales is an indication for the lack of correlated synaptic input, in particular for pairs that belong to the same module, and therefore should have received common input.

### Lumbar connectivity is sparse

So far, our analysis has focused on shared input to neighboring neurons or correlations in spiking activity of extracellularly-identified neurons. By combining intracellular and extracellular recordings together within the lumbar region, it is possible to identify local connections and directly test whether they are inhibitory or excitatory. By inserting an intracellular electrode in conjunction with the Si-arrays (**Fig. 8a**) we compared the timing of spikes by neurons in the population with synaptic events in the membrane potential ( $V_m$ ). The  $V_m$  of one neuron (**Fig. 8b**) is shown together with the population spiking activity (**Fig. 8c**). If there was a

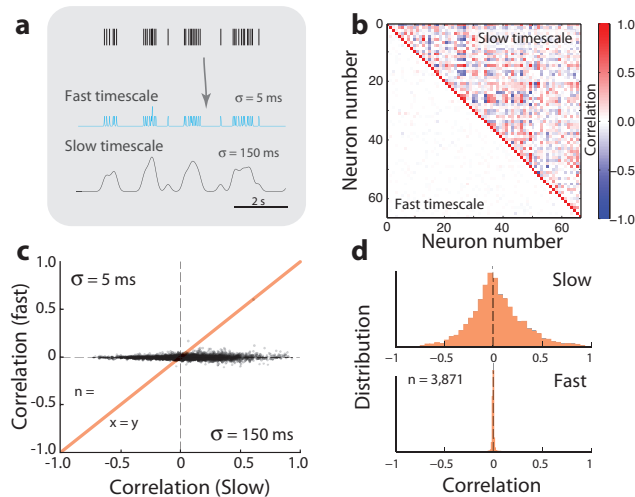

**Figure 7: Decoupling of slow and fast spiking timescales.** (a) Spike trace separated into slow and fast activity by convolving spike times with different Gauss-kernels ( $\sigma = 5$  and  $150\text{ms}$ ). (b) Correlation matrix for the neuronal spiking on fast (lower left) and slow timescales (upper right), indicate a decoupling between the functional relation across pairs of neurons and their synaptic input. (c) Pairwise correlation on slow (x-axis) and fast timescales (y-axis) indicate a decoupling and departure from the unity line (orange).  $n = 2,874$  pairs, two hemicords. (d) Histogram of slow correlation (top) is broadly scattered whereas the fast correlation is scattered tightly around zero (bottom).

connection from an extracellularly-recorded neuron to the intracellularly-recorded neuron, a spike should evoke either an excitatory or an inhibitory post-synaptic potential (EPSP or IPSP). Consequently, we could verify both a connection and its identity. An inhibitory connection was confirmed by a spike-triggered median trace with a negative peak significantly outside of the reference distribution (**Fig. 8d**). The associated extracellular waveform of the inhibitory cell was recorded on multiple electrodes on the shank (**Fig. 8e**). The decay-time constant of  $\sim 5\text{ms}$  of the identified inhibitory cells ( $n = 5$ ) was comparable to previously identified glycinergic inhibition<sup>36,37</sup> (**Fig. 8f**). The significance of the synaptic connections was established by comparison of the IPSP-peak with that of a surrogate data, where a temporal structure had been abolished by random jitter of the spike-times (**Fig. 8g**). The inhibitory activity is shown in blue (**Fig. 8c**), where one inhibitory unit is concurrent active with excitation, while three are alternating, indicating the complexity of the population activity.<sup>38</sup> The verified synaptic connections give a connectivity probability of only 0.9% of inhibitory input, and even lower for the excitatory units. Similar low estimates (1%) has previously been obtained indirectly in the medulla respiratory system.<sup>11,39</sup>

## DISCUSSION

Although substantial progress has been made in describing spinal cell types and projection patterns<sup>2,4,31,40,41</sup> remarkably little is known about connectivity in motor circuits. Indeed, the size and extent of the neuronal population involved in generating motor activity are unknown, and essential features of graph theory, such as convergence versus divergence, degree distributions,<sup>28</sup> and sparseness remain open issues. In this report, we address the network architecture of spinal CPGs from a dynamics perspective by employing intra and extracellular recordings from pairs of lumbar INs and MNs. We find a remarkable absence of correlation of input across all pairs, even for pairs that are strongly correlated on a slow timescale, and therefore belong to the same functional module. This paradoxical finding can be interpreted in two ways: 1) the common drive network is much larger than previously assumed, and the driving neurons are sparsely connected and convergent upon the receiving lumbar neurons; or 2) there is a pervasive *active decorrelation* cancelling an otherwise correlated drive from a smaller and denser network. Active decorrelation has been found among correlated sensory input to cortical networks.<sup>23,24,25,26</sup> It is worth noting that these two interpretations are not mutually exclusive. A network, which possesses both active decorrelation, as well as sparse connectivity, is indeed possible.<sup>42</sup> A circuit motif, which could participate in active decorrelation by combining feedforward excitation with inhibition, has been reported in the vertebrate spinal cord.<sup>43</sup> Nevertheless, the latter interpretation implies a radically different network structure, since such an ‘asynchronous state’ is characterized by widespread



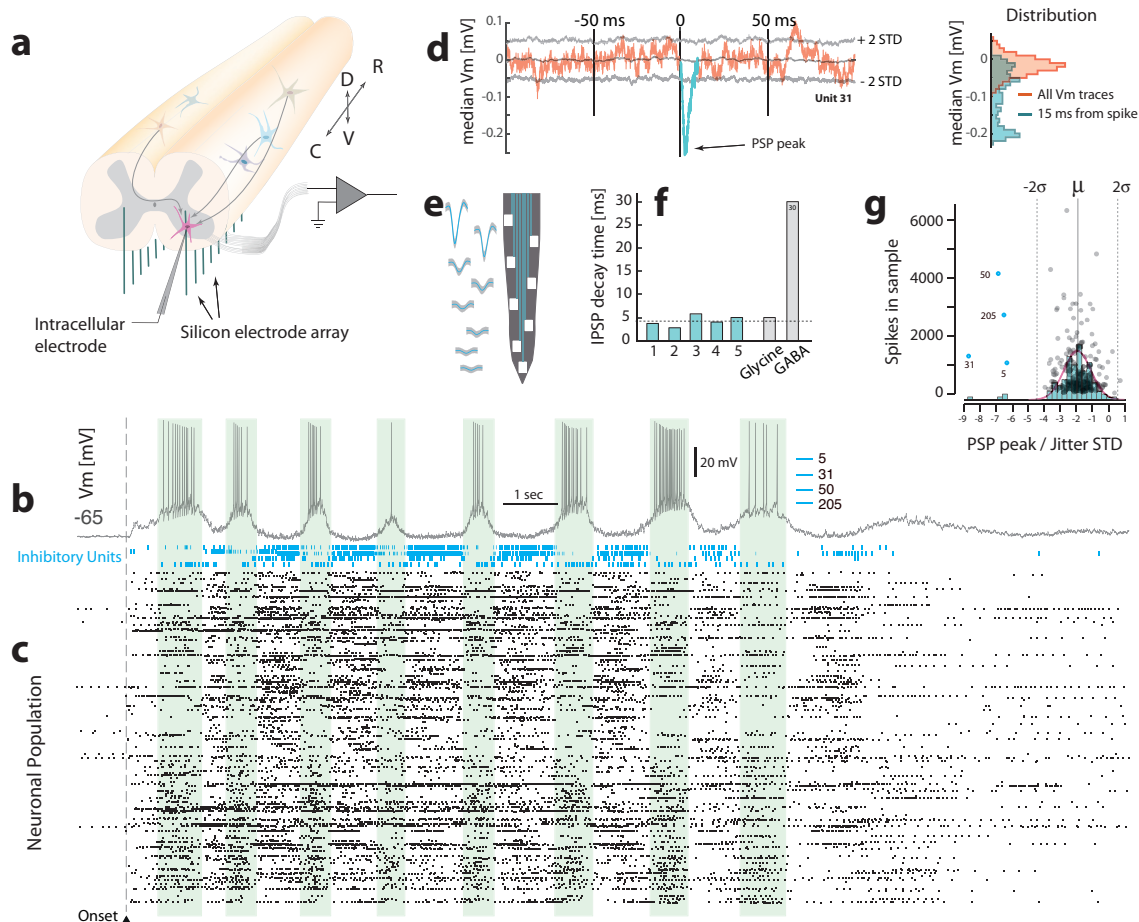

**Figure 8: Lumbar connection probability is small.** (a) Local inhibitory and excitatory connections are verified by combining intra-cellular recording ( $V_m$ ) with extracellular multi-electrode arrays (inserted ventrally). (b)  $V_m$  during motor activity with nearby neuronal population (c,  $n = 249$ ). Four inhibitory cells were identified (blue rasters). (d) Spike-triggered median  $V_m$  indicates an IPSP with a significant peak (cf. red and blue traces). Gray lines indicate  $\pm 2$  standard deviations of a jittered distribution. (e) Waveforms of inhibitory cell (d) on shank electrodes. (f) IPSP decay timeconstants for the significant 5 units (green) indicate glycinergic rather than GABAergic inhibition (gray). (g) PSP peaks normalized by the jitter distribution standard deviation scatter plotted against number of spikes in sample. Only 4 units (blue) were significant in this data set.

recurrent inhibition and excitation,<sup>21,23</sup> which is fundamentally dissimilar to the conventional feedforward scheme of spinal motor networks.

### Sparse connectivity and large premotor network

Although most networks in the brain are sparse, likely due to their low wiring cost,<sup>28</sup> such topology remains to be verified in spinal motor networks. Spinal CPGs have been suggested to rely either on ‘unit oscillators’,<sup>30,2</sup> or a multilayered half-center model with ‘centers’, consisting of neurons with similar properties, connected in a feedforward manner<sup>31,12</sup> (**Fig. 1**). The internal connectivity in a module has been proposed to consist of glutamatergic neurons with recurrent connectivity to induce reverberate internal activity.<sup>44</sup> The lower modules are driven by a descending common network, which is responsible for the rhythm generation. This feedforward divergent wiring from a small neuronal population, which orchestrates a larger population, would result in a substantial overlap in synaptic input (**Fig. 1b**). Since we did not find the correlated activity that such overlap would cause, our data support either a sparse feedforward network with convergent connections or a recurrent network architecture with active decorrelation.

Although the purpose of a sparse network architecture is non-obvious, it may be relevant for controllability. The circuitry in the spinal cord produces overall motor activity, but supraspinal centers, especially the primary motor cortex and the brainstem, can exert a major influence on this activity. The pertinent question is what type of spinal circuit architecture best accommodates the influence from supraspinal regions. Controllability is an active topic of investigation in graph theory, and it is defined as the ability to drive the network from any intrinsic state to any other state. It was suggested that sparse architectures are difficult to control compared with dense architectures.<sup>45</sup> Here, hubs<sup>28</sup> and modules may serve as intermediaries for supraspinal input. Finding modules in sparse networks is generally difficult,<sup>46</sup> but an obvious location to inspect is where the corticospinal projections terminate. The issue of how such few supraspinal fibers can control motor behavior remains to be investigated and understood from a network perspective.

### Active decorrelation: novel purpose for spinal inhibition?

A surprising absence of correlation across a neuronal population which is known to receive shared input has been observed in cortical networks.<sup>23,24,25,26</sup> This enigmatic observation has motivated theoretical studies in active decorrelation since it was suspected to be the source. If inhibitory feedforward and feedback loops are present in networks, as recent data suggest,<sup>47</sup> they will participate in the decorrelation of an otherwise correlated feedward input.<sup>29,42</sup> The recurrent inhibition,<sup>21</sup> which is found in theoretical sparse networks that have balanced excitation and inhibition, can explain a low cross-correlation, which would otherwise be large.<sup>42</sup> It was proposed that recurrent inhibition is likely responsible for the active decorrelation, and the purpose of such decorrelation is primarily to reduce noise from correlated excitatory drive.<sup>42</sup> A similar mechanism could play a role in spinal networks, where a clear advantage exists of reducing the correlated noise to ensure stable and smooth movements. This introduces a novel purpose of inhibitory interneurons in spinal circuits, which has not previously been considered. Spinal inhibition has traditionally been associated with ‘sculpting’ of the motor rhythm via reciprocal connections<sup>2,12</sup> or modulation of gain during motor control.<sup>20</sup> Nevertheless, since active decorrelation occurs in networks with a balance between excitation and inhibition,<sup>23,24</sup> and such concurrent E/I activity has been observed in spinal motor networks under certain circumstances,<sup>48,49,50</sup> it is quite possible that part of the low correlation could be explained by this mechanism. This could also explain the large number of interneurons, which is eightfold more numerous than MNs.<sup>51</sup> Such a new perspective on the purpose of inhibition in spinal networks remains to be substantiated in future experiments.

## Methods

**Definition of sparse networks** The *density* (or *connectance*),  $\xi$ , of a network is often defined as the number of connections,  $C$ , over the maximum possible number of connections  $C_{max}$ .<sup>27</sup> In our model (**Fig. 1b-c**) the number of neurons is  $n_1$  in the source network (yellow region) and  $n_2$  for the receiving network (blue region). The maximal number of connections is then  $C_{max} = n_1 \cdot n_2$ . We assume that the number of incoming connections to the receiving neurons, i.e. the in-degree  $k$ , is constant regardless of  $n_1$  and  $n_2$ . The total

number of connections is therefore  $C = k \cdot n_2$  and  $\xi$  is independent on the number of receiving neurons,  $n_2$ :

$$\xi = \frac{C}{C_{max}} = \frac{k}{n_1}$$

The formal definition of a *dense* network according to graph theory is a network where  $\xi$  approaches a constant ( $> 0$ ) as the network size increases  $n_1 \rightarrow \infty$ . A *sparse* network is a network where  $\xi \rightarrow 0$  as  $n_1 \rightarrow \infty$ .<sup>27</sup> In biological networks the size of a network cannot approach infinity or even be changed. Therefore the definitions of sparse and dense networks are less helpful. A practical definition of a sparse network we therefore suggest a network where the density  $\xi$  is very low. Further, we define sparseness ( $\rho$ ) as  $\rho = 1 - \xi = 1 - k/n_1$ , i.e. the inverse of the density. Other definitions of sparse connectivity is a low probability ( $\sim 10\%$ ) of finding a connection between neurons.<sup>52</sup>

**Experimental preparation** 80 adult red-eared turtles (*Trachemys scripta elegans*) of both sexes were used in this study. Animal was placed on crushed ice for 2 hrs. to ensure hypothermic anesthesia, then killed by decapitation and blood substituted by perfusion with a Ringer solution containing (in mM): 120 NaCl; 5 KCl; 15 NaHCO<sub>3</sub>; 2MgCl<sub>2</sub>; 3CaCl<sub>2</sub>; and 20 glucose, saturated with 98% O<sub>2</sub> and 2% CO<sub>2</sub> to obtain pH 7.6. The carapace containing the D4-S2 spinal cord segments (corresponding to the cervical to lumbar regions) was isolated by transverse cuts as described previously<sup>48,20,53,54</sup> and the cord was perfused with Ringer's solution through the *vertebral foramen*, via a steel tube and gasket pressing against the D4 vertebra. The surgical procedures comply with Danish legislation and were approved by the controlling body under the Ministry of Justice.

**Activation of motor program** To reproducibly activate the scratching motor pattern, a linear actuator was applied to provide mechanical touch on the skin around the legs meeting the carapace. The somatic touch was controlled by a function generator (TT2000, Thurlby Thandar instrument, UK) and consisted of a ten-second long sinusoidal movement (1 Hz). The touch was applied on the border of the carapace marginal shields M9-M10 and the soft tissue surrounding the hindlimb, which is the receptive field for inducing pocket scratching motor pattern.<sup>53</sup>

**Electrophysiology** Each scratch episode lasted approximately 20 s. A new trial was initiated after a 5 min rest. Electroneurogram recordings (ENG) were performed with suction electrodes of the hip flexor nerve and dD8 at the level of D9-D10 vertebra. The ENGs were recorded with a differential amplifier Iso-DAM8. The bandwidth was 300 Hz - 1 kHz. The transverse cut was performed at the caudal end of D10 of the spinal cord in order to get access to the motor- and inter-neurons.<sup>54</sup> Pairwise intracellular recordings were performed using sharp electrodes ( $\approx 40M\Omega$ ). The electrodes were filled with a mixture of 0.9 M potassium acetate and 0.1 M KCl. In most experiments the electrodes also contained 4% W/V biocytin to leave a stain in the cell for post hoc histology. All experiments were conducted in current-clamp mode with a Multiclamp 700B amplifier (Molecular devices, Union City, CA). Data were sampled at 10 kHz with a 16-bit analog-to-digital converter, controlled and displayed with Clampex software. Glass pipettes were pulled on a P-1000 (Sutter instruments, USA). Motoneurons were accessed from the surface at a typical depth of 50-300  $\mu m$  using motorized micromanipulators.

**Multi-electrode recordings** Extracellular multi-electrode recordings were performed in parallel at 40 KHz using a 254-channel multiplexed Ampliplex amplifier (KJE-1001, Ampliplex). Up to four 64-channel silicon probes were inserted in the spinal cord from ventral side in incisions perpendicular to the spinal cord. We used the 64-channel probes (Berg64-probe from NeuroNexus Inc., Ann Arbor, MI, USA) with 8 shanks, and 8 recording sites on each shank arranged in a staggered configuration with 30  $\mu m$  vertical distance (**Fig. 6a**). The shanks are distanced 200  $\mu m$  apart. Recordings were performed at depths in the range of 400-1000  $\mu m$  inserted from the ventral side of the cord.

**Identification of motoneurons** Motoneurons were mainly identified by their location in the ventral horn, size (via  $R_m$ ), size of action potentials and spiking relation with nerve activity. A subset was filled with biocytin for histological processing. The tissue containing the motoneuron was carefully removed and left

in phosphate buffered saline (PBS) with 4% paraformaldehyde for 24-48 hrs. The tissue was then rinsed with and stored in PBS. The tissue section was mounted in an agar mount and sliced into several  $100\mu\text{m}$  slices using a microtome (Leica, VT1000 S). The slices were incubated for 3 - 4 hr at room temperature with Cyanine-3-conjugated (Cy3) to streptavidin (1:500 or 1:250 Jackson ImmunoResearch labs, Inc) in blocking buffer (PBS with 5% donkey serum and 0.3% Triton X-100). The slices were washed with PBS and incubated overnight at  $4^{\circ}\text{C}$  with primary choline acetyltransferase (ChAT) antibodies goat anti-ChAT antibodies (1:500, AB144P, Millipore, USA) diluted in blocking buffer. The slice was washed three times with PBS and incubated for 1 hr at room temperature with the secondary antibody Alexa488 conjugated to donkey anti-goat antibodies (1:1000 Jackson) diluted in blocking buffer. After three washes with PBS, the slice was mounted and coverslipped using ProLong®Gold antifade reagent (Invitrogen Molecular Probes, USA) and cured overnight at room temperature before microscopy. Micrographs were produced using a confocal microscope, Zeiss LSM 700 with diode lasers, on a Zeiss Axiomager M2 using a 20x/0.8 Apochromat objective (Zeiss). The fluorophores were excited/detected at: Cy3 at 555nm/ 559-700 nm, Alexa488 at 488nm/405-544 nm, and DAPI at 405/420-700 nm. The pinhole was  $35\mu\text{m}$  resulting in an optical section of  $2\mu\text{m}$ . For all the channels a mosaic of 5x6 was made. During the z-stack of Cy3 fluorescence 15 optical slices with slight overlap gave a total optical section of  $28\mu\text{m}$ . A maximum-intensity-projection of the Cy3 z-stack was done and superimposed on the DAPI and Alexa488 image. The DAPI and Alexa488 image was taken in the middle of the Cy3 z-stack. Images were handled with ZEN 2011 software (Zeiss) in the LSM and 8-bit TIFF format.

**Model and simulation** The simulations (**Fig. 2**) were done using the NEST simulator (<http://www.nest-simulator.org>) ver. 2.10.<sup>55</sup> A leaky integrate-and-fire cell model was employed with conductance based synapses, for which, spiking was disabled. Each simulation lasted for 5000 ms. The parameters of the cell model was set to have a membrane capacity of 250 pF, leak conductance of 16.67 nS and resting potential of -60 mV. Excitatory synapses were modeled as exponentially decaying conductances with a peak conductance 10 nS, timescale 1 ms and reversal potential 0 mV. The presynaptic interneuron population was modeled as an inhomogeneous Poisson process with a mean firing rate of 12 spikes/s modulated with a 1 Hz sinusoidal oscillation with 10 spikes/s amplitude. Average pair-wise correlation coefficient between membrane potentials was calculated in a group of 30 motorneurons each receiving 10 synaptic inputs from a presynaptic pool of excitatory interneurons (see below). The size of the presynaptic interneuron pool was varied (in separate simulations) between 10 and 500.

## Data analysis

All data analysis was performed in custom designed procedures either in Matlab (Mathworks, R2014b) or Python ([www.python.org](http://www.python.org)). Spike sorting was performed using Spyking Circus.<sup>56</sup> The intracellular membrane potential recordings were digitally filtered using a 3-pole butterworth filter in both directions to cancel phase distortion using the 'filtfilt' function in Matlab. The fast activity was high pass filtered with cut off 5 Hz after removing any potential action potentials. The slow activity was band-pass filtered from 0.2-5 Hz. These signals were then cross-correlated in pairwise fashion using Pearson correlation:

$$R_{xy} = \frac{\sum_{i=1}^n (x_i - \bar{x})(y_i - \bar{y})}{\sqrt{\sum_{i=1}^n (x_i - \bar{x})^2} \sqrt{\sum_{i=1}^n (y_i - \bar{y})^2}} \quad (1)$$

where  $x_i$  and  $y_i$  are the two arrays of observations to be compared,  $n$  is the number of observations, and  $\bar{x} = \sum_{i=1}^n (x_i)/n$ , is the sample mean. The confidence limits were calculated by comparing the correlation coefficients to those achieved by shifting one trace with a delay, which is randomly selected, i.e. the shuffled data. The 95% confidence limit was  $\pm 1.96\sigma$  from the mean for the shuffled distribution. Phase between the rhythmic activity of two neurons recorded intracellularly was calculated as the location of the peak in the cross-correlation function of the low-pass filtered  $V_m$  trace shift in time.

**Polar histograms of the spike triggered phase** The nerve activity was estimated by convolving the nerve signal with a Gaussian kernel ( $\sigma = 150\text{ms}$ ) similar to the estimates of spike rates. The phase of the nerve activity was calculated by use of the Hilbert transform.<sup>57</sup> The Hilbert transform gave a complex value over time, where the angle of the complex number is the instantaneous phase value. Before applying the transform



the nerve activity was high pass filtered at 0.1 Hz. We only calculated the spike triggered phase on nerve signals when there was a ongoing activity (as seen in Fig. 6).

**Pairwise correlation in spike rates: slow and fast** Spike rates were convolved with a broad and narrow Gaussian kernels,<sup>58</sup>

$$k(t) = \frac{1}{\sqrt{2\pi}\sigma} \exp\left(-\frac{t^2}{2\sigma^2}\right) \quad (2)$$

where  $\sigma = 5ms$  and  $\sigma = 150ms$ , respectively, to capture the slow and the fast activity (Fig. 7). The spike rates were further high-pass filtered with a 3-pole Butterworth filter using a zero-phase filter ('filtfilt.m') function in Matlab, with a cut-off frequency of 0.3 Hz for the slow activity and 10 Hz for the fast activity. We wanted to only consider rhythmically neurons in the analysis, since these are related to the motor activity and easy to group functionally. We test if units are rhythmically active in relation to the motor program by applying Rayleigh's test for circular uniformity. The unit that did not have rhythmic activity was excluded using the Rayleigh test of circular statistics.<sup>59</sup> The test statistic was  $z = NR^2$ , where  $R$  is the length of the average phase vector in polar coordinates, and  $N$  is the number of spikes for a given unit. The test statistic was Rayleigh's test for circular uniformity<sup>60,61</sup> with a significance level of 5%. The p-value was estimated as

$$p = \exp\left[\sqrt{(1 + 4N + 4(N^2 - R_N^2))} - (1 + 2N)\right] \quad (3)$$

where  $R_N = R \cdot N$ . Using this level,  $N = 1701$  units were excluded out of the a total of 5791 recorded units over 3 animals (Fig. 7). For these significantly rhythmic units the cross-correlation was calculated for all pairs, both on slow and on fast timescales.

**Local connectivity from combining intracellular and extracellular recordings** The combination of the intracellular recording from a single cell and the simultaneous recordings from hundreds of neurons recorded extracellularly can be extracted from previous reports,<sup>49,19,54</sup> but are describe briefly here. Three animals were implanted each with three 64-channel probes (Berg64-probes, Neuronexus inc.) in D8, D9 and D10. These are lumbar segments in the turtle corresponding to L2-L5 in mammals.<sup>51</sup> In addition, an intracellular sharp electrodes was inserted from the ventral side and ipsilaterally to the probe in D10. Spike sorting was performed in open source software (Klustakwik-suite: SpikeDetekt, KlusterKwik v.3.0 and KlustaViewa<sup>62</sup>). Spike-triggered average (STA) and spike-triggered median (STM) membrane potential ( $V_m$ ) of an intracellular recorded neuron was calculated for all simultaneous extracellular recorded neurons, typically 200–300 neurons. In order to minimize the impact of large excursions in  $V_m$  due to the occurrence of action potentials, the median of  $V_m$  was used and z-scored, i.e.

$$z_{V_m} = \frac{V_m - \mu_{V_m}}{\sigma_{V_m}} \quad (4)$$

The z-scoring compensates for the different degree of fluctuations across recorded neurons. In order to set an unbiased connection-threshold we chose STM over STA, as STM allowed us to consider spike triggered traces with spike in them, as the median value is less affected by the skewness of the  $V_m$ -distribution, introduced by spikes in the  $V_m$ -trace. Average traces without spikes in the spike triggered window, were observed to be visually indistinguishable from the median traces. To test whether the spike-triggered synaptic potentials were exceeding chance level, we compared the temporal structure in  $z_{V_m}$  with a surrogate data set, where the spike times had been jittered. The location of the spike in time were locally "jittered" to abolish temporal structure using the interval jitter method<sup>63</sup> of size 100 ms. The same analysis was then performed to establish a distribution of  $z_{V_m}$  when there is no causal structure.

## AUTHOR CONTRIBUTIONS

Conceptualization, M.R. and R.W.B.; Methodology, Investigation, Software, Visualization, Formal Analysis, R.W.B., M.R., A.W., M.V., P.C.P, H.L. ; Writing-Original Draft, Funding Acquisition, Supervision, R.W.B.

## ACKNOWLEDGEMENTS

Thanks to P.A. Kirkwood and P. Roland for comments on an earlier version of the manuscript. Funded by The Independent Research Fund, Denmark (RB and MR) and Mobilex with European Union co-fund program (HL). The work is part of the Dynamical Systems Interdisciplinary Network, University of Copenhagen.

## References

- <sup>1</sup> Wang, X. *et al.* Laser ablation of Dbx1 neurons in the pre-Botzinger complex stops inspiratory rhythm and impairs output in neonatal mice. *eLife* **3**, e03427 (2014).
- <sup>2</sup> Whelan, P. J. Shining light into the black box of spinal locomotor networks. *Philos Trans R Soc Lond B Biol Sci* **365**, 2383–95 (2010).
- <sup>3</sup> Grillner, S. Biological pattern generation: the cellular and computational logic of networks in motion. *Neuron* **52**, 751–66 (2006).
- <sup>4</sup> Hinckley, C. A. *et al.* Spinal Locomotor Circuits Develop Using Hierarchical Rules Based on Motorneuron Position and Identity. *Neuron* **87**, 1008–1021 (2015).
- <sup>5</sup> Caggiano, V. *et al.* Midbrain circuits that set locomotor speed and gait selection. *Nature* **553**, 455–460 (2018).
- <sup>6</sup> Capelli, P., Pivetta, C., Esposito, M. S. & Arber, S. Locomotor speed control circuits in the caudal brainstem. *Nature* **551**, 373–377 (2017).
- <sup>7</sup> De Luca, C. J. & Erim, Z. Common drive in motor units of a synergistic muscle pair. *J. Neurophysiol.* **87**, 2200–2204 (2002).
- <sup>8</sup> Kirkwood, P. A. & Sears, T. The synaptic connexions to intercostal motoneurons as revealed by the average common excitation potential. *J. Physiol.* **275**, 103–134 (1978).
- <sup>9</sup> Nordstrom, M. A., Fuglevand, A. J. & Enoka, R. M. Estimating the strength of common input to human motoneurons from the cross-correlogram. *J. Physiol.* **453**, 547–574 (1992).
- <sup>10</sup> Nielsen, J. B., Conway, B. A., Halliday, D. M., Perreault, M.-C. & Hultborn, H. Organization of common synaptic drive to motoneurons during fictive locomotion in the spinal cat. *J Physiol* **569**, 291–304 (2005).
- <sup>11</sup> Carroll, M. S. & Ramirez, J.-M. Cycle-by-cycle assembly of respiratory network activity is dynamic and stochastic. *J Neurophysiol* **109**, 296–305 (2013).
- <sup>12</sup> McCrea, D. A. & Rybak, I. A. Organization of mammalian locomotor rhythm and pattern generation. *Brain Res Rev* **57**, 134–46 (2008).
- <sup>13</sup> Keen, D. a. & Fuglevand, A. J. Common input to motor neurons innervating the same and different compartments of the human extensor digitorum muscle. *J. Neurophysiol.* **91**, 57–62 (2004).
- <sup>14</sup> Farina, D., Negro, F., Muceli, S. & Enoka, R. M. Principles of motor unit physiology evolve with advances in technology. *Physiology* **31**, 83–94 (2016).
- <sup>15</sup> Farina, D., Negro, F. & Dideriksen, J. L. The effective neural drive to muscles is the common synaptic input to motor neurons. *J Physiol* **592.16**, 3427–3441 (2014).
- <sup>16</sup> Hamm, T. M., Trank, T. V. & Turkin, V. V. Correlations between neurograms and locomotor drive potentials in motoneurons during fictive locomotion: implications for the organization of locomotor commands. *Prog Brain Res* **123**, 331–9 (1999).
- <sup>17</sup> Pernice, V., Staude, B., Cardanobile, S. & Rotter, S. How structure determines correlations in neuronal networks. *PLoS Computational Biology* **7** (2011).

- <sup>18</sup> Vaughan, C. W. & Kirkwood, P. A. Evidence from motoneurone synchronization for disynaptic pathways in the control of inspiratory motoneurons in the cat. *J Physiol* **503**, 673–89 (1997).
- <sup>19</sup> Petersen, P. C. & Berg, R. W. Lognormal firing rate distribution reveals prominent fluctuation-driven regime in spinal motor networks. *eLife* **5**, e18805 (2016).
- <sup>20</sup> Vestergaard, M. & Berg, R. W. Divisive Gain Modulation of Motoneurons by Inhibition Optimizes Muscular Control. *J Neurosci* **35**, 3711–3723 (2015).
- <sup>21</sup> Windhorst, U. On the role of recurrent inhibitory feedback in motor control. *Progress in neurobiology* **49**, 517–587 (1996).
- <sup>22</sup> Sussillo, D. & Abbott, L. F. Generating coherent patterns of activity from chaotic neural networks. *Neuron* **63**, 544–57 (2009).
- <sup>23</sup> Renart, A. *et al.* The asynchronous state in cortical circuits. *Science* **327**, 587–90 (2010).
- <sup>24</sup> Ecker, A. S. *et al.* Decorrelated neuronal firing in cortical microcircuits. *Science* **327**, 584–7 (2010).
- <sup>25</sup> Sippy, T. & Yuste, R. Decorrelating action of inhibition in neocortical networks. *J Neurosci* **33**, 9813–30 (2013).
- <sup>26</sup> Graupner, M. & Reyes, A. D. Synaptic Input Correlations Leading to Membrane Potential Decorrelation of Spontaneous Activity in Cortex. *J Neurosci* **33**, 15075–15085 (2013).
- <sup>27</sup> Newman, M. E. J. *Networks: An introduction* (Oxford University Press, 2010).
- <sup>28</sup> Bullmore, E. & Sporns, O. The economy of brain network organization. *Nat Rev Neurosci* **13**, 336–349 (2012).
- <sup>29</sup> Hertz, J. Cross-correlations in high-conductance states of a model cortical network. *Neural computation* **22**, 427–47 (2010).
- <sup>30</sup> Grillner, S. & Zangger, P. On the central generation of locomotion in the low spinal cat. *Experimental Brain Research* **34**, 241–261 (1979).
- <sup>31</sup> Kiehn, O. Decoding the organization of spinal circuits that control locomotion. *Nature Reviews Neuroscience* **17**, 224–238 (2016).
- <sup>32</sup> Berkowitz, A. Rhythmicity of spinal neurons activated during each form of fictive scratching in spinal turtles. *J Neurophysiol* **86**, 1026–36 (2001).
- <sup>33</sup> Machado, T. A., Pnevmatikakis, E., Paninski, L., Jessell, T. M. & Miri, A. Primacy of Flexor Locomotor Pattern Revealed by Ancestral Reversion of Motor Neuron Identity. *Cell* **162**, 338–350 (2015).
- <sup>34</sup> Kwan, A. C., Dietz, S. B., Zhong, G., Harris-Warrick, R. M. & Webb, W. W. Spatiotemporal dynamics of rhythmic spinal interneurons measured with two-photon calcium imaging and coherence analysis. *J Neurophysiol* **104**, 3323–3333 (2010).
- <sup>35</sup> Yim, M. Y., Kumar, A., Aertsen, A. & Rotter, S. Impact of correlated inputs to neurons: modeling observations from in vivo intracellular recordings. *Journal of Computational Neuroscience* **37**, 293–304 (2014).
- <sup>36</sup> Kolind, J., Hounsgaard, J. & Berg, R. W. Opposing effects of intrinsic conductance and correlated synaptic input on Vm-fluctuations during network activity. *Front. Comput. Neurosci.* **6**, 40 (2012).
- <sup>37</sup> Russier, M., Kopysova, I. L., Ankri, N., Ferrand, N. & Debanne, D. GABA and glycine co-release optimizes functional inhibition in rat brainstem motoneurons in vitro. *Journal of Physiology* **541**, 123–137 (2002).
- <sup>38</sup> Berg, R. W. Neuronal Population Activity in Spinal Motor Circuits: Greater Than the Sum of Its Parts. *Front. Neural Circuits* **11**, 103 (2017).

- <sup>39</sup> Kirkwood, P. A., Munson, J. B., Westgaard, R. H. & Sears, T. A. The organization of the respiratory input to intercostal motoneurons: the contribution from interneurons? In Sieck, G., Gandevia, S. & Cameron, W. (eds.) *Respiratory muscles and their neuromotor control.*, 157–166 (A. R. Liss, New York, 1987).
- <sup>40</sup> Goetz, C., Pivetta, C. & Arber, S. Distinct Limb and Trunk Premotor Circuits Establish Laterality in the Spinal Cord. *Neuron* **85**, 131–145 (2015).
- <sup>41</sup> Arber, S. Motor circuits in action: specification, connectivity, and function. *Neuron* **74**, 975–89 (2012).
- <sup>42</sup> Tetzlaff, T., Helias, M., Einevoll, G. T. & Diesmann, M. Decorrelation of Neural-Network Activity by Inhibitory Feedback. *PLoS Computational Biology* **8** (2012).
- <sup>43</sup> Parker, D. Activity-dependent feedforward inhibition modulates synaptic transmission in a spinal locomotor network. *J. Neurosci.* **23**, 11085–93 (2003).
- <sup>44</sup> Kiehn, O. *et al.* Excitatory components of the mammalian locomotor CPG. *Brain Res Rev* **57**, 56–63 (2008).
- <sup>45</sup> Liu, Y.-Y., Slotine, J.-J. & Barabási, A.-L. Controllability of complex networks. *Nature* **473**, 167–73 (2011).
- <sup>46</sup> Singh, A. & Humphries, M. D. Finding communities in sparse networks. *Scientific Reports* **5**, 8828 (2015).
- <sup>47</sup> Hayashi, M. *et al.* Graded Arrays of Spinal and Supraspinal V2a Interneuron Subtypes Underlie Forelimb and Hindlimb Motor Control. *Neuron* **97**, 869–884 (2018).
- <sup>48</sup> Berg, R. W., Alaburda, A. & Hounsgaard, J. Balanced inhibition and excitation drive spike activity in spinal half-centers. *Science* **315**, 390–3 (2007).
- <sup>49</sup> Petersen, P. C., Vestergaard, M., Jensen, K. H. R. & Berg, R. W. Premotor Spinal Network with Balanced Excitation and Inhibition during Motor Patterns Has High Resilience to Structural Division. *J Neurosci* **34**, 2774–2784 (2014).
- <sup>50</sup> Machado, T. A. *Probing circuits for spinal motor control.* Ph.d. thesis, Columbia University Academic Commons (2015). URL <https://academiccommons.columbia.edu/catalog/ac:189508>.
- <sup>51</sup> Walloe, S., Nissen, U. V., Berg, R. W., Hounsgaard, J. & Pakkenberg, B. Stereological estimate of the total number of neurons in spinal segment D9 of the red-eared turtle. *J. Neurosci.* **31**, 2431–5 (2011).
- <sup>52</sup> Ponzi, A. & Wickens, J. Sequentially switching cell assemblies in random inhibitory networks of spiking neurons in the striatum. *J Neurosci* **30**, 5894–911 (2010).
- <sup>53</sup> Mortin, L. I., Keifer, J. & Stein, P. S. Three forms of the scratch reflex in the spinal turtle: movement analyses. *J. Neurophysiol.* **53**, 1501–16 (1985).
- <sup>54</sup> Petersen, P. C. & Berg, R. W. Spinal Cord Preparation from Adult Red-Eared Turtles for Electrophysiological Recordings during Motor Activity. *Bio-protocol* **7**, e2381 (2017).
- <sup>55</sup> Bos, H. *et al.* NEST 2.10.0 DOI: 10.5281/ZENODO.44222 (2015).
- <sup>56</sup> Yger, P. *et al.* Fast and accurate spike sorting in vitro and in vivo for up to thousands of electrodes. *bioRxiv* (2016).
- <sup>57</sup> Oppenheim, A. V., Schaffer, R. W. & Buck, J. R. *Discrete Time Signal Processing*, vol. 1999 (Prentice Hall Press, Upper Saddle River, NJ, USA, 1999).
- <sup>58</sup> Shimazaki, H. & Shinomoto, S. Kernel bandwidth optimization in spike rate estimation. *J. comput. neurosci.* **29**, 171–82 (2010).
- <sup>59</sup> Mardia, K. V. & Jupp, P. E. *Directional Statistics* (Wiley and sons, Chichester, 2000).
- <sup>60</sup> Zar, J. H. *Biostatistical Analysis* (Prentice Hall, 1999), 4th edn.



- <sup>61</sup> Berens, P. CircStat : A MATLAB Toolbox for Circular Statistics. *Journal of Statistical Software* **31**, 1–21 (2009).
- <sup>62</sup> Kadir, S. N., Goodman, D. F. M. & Harris, K. D. High-dimensional cluster analysis with the masked EM algorithm. *Neural Comput* **26**, 2379–94 (2014). arXiv:arXiv:1309.2848v1.
- <sup>63</sup> Platkiewicz, J., Stark, E. & Amarasingham, A. Spike-centered jitter can mistake temporal structure. *Neural Computation* **29**, 783–803 (2017). arXiv:1309.2848v1.
